# 1 Deleterious functional consequences of perfluoroalkyl substances 2 accumulation into the myelin sheath

3 L. Butruille<sup>1\*</sup>, P. Jubin<sup>1\*</sup>, E. Martin<sup>1</sup>, MS. Aigrot<sup>1</sup>, M. Lhomme<sup>2</sup>, JB. Fini<sup>3</sup>, B. Demeneix<sup>3</sup>,  
4 B. Stankoff<sup>4</sup>, C. Lubetzki<sup>1</sup>, B. Zalc<sup>1#</sup> & S. Remaud<sup>3#</sup>

5 \*Co-first authors # Co-last authors

6 <sup>1</sup>Sorbonne University, Inserm, CNRS, Institut du Cerveau, Pitié-Salpêtrière Hospital, F-75013  
7 Paris, France,

8 <sup>2</sup>IHU ICAN (ICAN OMICS lipidomics) Foundation for Innovation in Cardiometabolism and  
9 Nutrition, Pitié-Salpêtrière Hospital, F-75013 Paris, France,

10 <sup>3</sup>CNRS UMR 7221, Sorbonne University, Muséum National d'Histoire Naturelle, F-75005 Paris  
11 France.

## 12 Corresponding Authors :

13 B. Zalc < [bernard.zalc@upmc.fr](mailto:bernard.zalc@upmc.fr) >

14 S. Remaud < [sremaud@mnhn.fr](mailto:sremaud@mnhn.fr) >

## 15 Authors' contributions

16 PJ, LB, EM, MSA, ML, BZ and SR performed the experiments and analyzed the data; SR and BZ  
17 wrote the manuscript; JBF, BD, BS and CL were involved in revising the manuscript critically for  
18 important intellectual content and made substantial contributions to interpretation of data. BZ and  
19 SR conceived the study and supervised experiments. All authors read and approved the final  
20 manuscript.

21 **Competing interest statement:** The authors have no conflict of interest to declare  
22 relevant to this manuscript.

23 **Classification:** Biological Sciences: Systems Neuroscience; Cellular and Molecular  
24 Neuroscience;

25 **Keywords :** Perfluorooctanoic acid (PFOA), Perfluorooctane sulfonate (PFOS), Myelin,  
26 Remyelination; Oligodendrocyte; Xenopus ; Subventricular zone ; Thyroid hormone

## 27 **Highlights**

- 28 • Our investigation points the deleterious effects of PFOS incorporation into the myelin  
29 sheath
- 30 • PFOS interfere dramatically with the generation of remyelinating and functional repair  
31 of demyelinating lesions
- 32 • Our study points to a potential link between these persistent pollutants and the recent  
33 increase in prevalence of multiple sclerosis

34

## 35 **Abstract**

36 Exposure to persistent organic pollutants during the perinatal period is of particular concern  
37 because of the potential increased risk of neurological disorders in adulthood. Here we  
38 questioned whether exposure to perfluorooctanoic acid (PFOA) and perfluorooctane sulfonate  
39 (PFOS) could alter myelin formation and regeneration. First, we show that PFOS, and to a lesser  
40 extent PFOA, accumulated into the myelin sheath of postnatal day 21 (p21) mice, whose mothers  
41 were exposed to either PFOA or PFOS (20mg/L) *via* drinking water during late gestation and  
42 lactation, suggesting that accumulation of PFOS into the myelin could interfere with myelin  
43 formation and function. In fact, PFOS, but not PFOA, disrupted the generation of  
44 oligodendrocytes, the myelin-forming cells of the central nervous system, derived from neural  
45 stem cells localised in the subventricular zone of p21 exposed animals. Then, cerebellar slices  
46 were transiently demyelinated using lysophosphatidylcholine and remyelination was quantified in  
47 the presence of either PFOA or PFOS. Only PFOS impaired remyelination, a deleterious effect  
48 rescued by adding thyroid hormone (TH). Similarly to our observation in the mouse, we also  
49 showed that PFOS altered remyelination in *Xenopus laevis* using the Tg(*Mbp:GFP-ntr*) model of  
50 conditional demyelination and measuring, then, the number of oligodendrocytes. The functional  
51 consequences of PFOS-impaired remyelination were shown by its effects using a battery of  
52 behavioural tests. In sum, our data demonstrate that perinatal PFOS exposure disrupts

53 oligodendrogenesis and myelin function through modulation of TH action. PFOS exposure may  
54 exacerbate genetic and environmental susceptibilities underlying myelin disorders, the most  
55 frequent being multiple sclerosis.

56

57

58

## 59 **1. Introduction (580 words)**

60 Perfluoroalkyl substances (PFAS) are a set of synthetic man-made chemicals produced for over 60  
61 years and widely found in biota, including humans (Calafat et al., 2019; Houde et al., 2016; Stubbleski  
62 et al., 2017). The most common of these commercial products - largely detected in cosmetics,  
63 textiles, food packaging - are perfluorooctanesulfonic acid (PFOS) and perfluorooctanoic acid  
64 (PFOA). Due to their long-fluorinated alkyl chain, the half-life of PFAS is exceptionally long (Li et  
65 al., 2018). Thus, they are particularly persistent in the environment, longer than any other  
66 environmental substance, especially in the human body for which the half-life is estimated about 4  
67 years for PFOA and PFOS (Olsen et al., 2017; Sunderland et al., 2019; Zhang et al., 2013). Several  
68 epidemiological studies and experimental analysis using animal models have demonstrated health  
69 consequences of PFOA and PFOS including alterations of lipid metabolism, hepatotoxicity,  
70 reproduction function as well as impacts on development since PFAS can cross placenta and  
71 accumulate in breast milk, thus reaching the offspring (Caporale et al., 2022; Demeneix, 2014).  
72 However, there is a paucity of experimental studies evaluating neurobehavioral and molecular  
73 mechanisms of neurotoxicity for PFAS (Starnes et al., 2022). PFOA and PFOS have been regulated  
74 to limit their use under the Stockholm Convention. However, the current bioaccumulation of these  
75 PFAS is so high, that a better understanding of the mechanisms by which PFAS could alter  
76 homeostasis is still crucial. Moreover, PFAS are amphiphile compounds that could stick to surfaces  
77 and accumulate in adipose tissue (Lee et al., 2017) and potentially in other lipid-rich structures,  
78 such as myelin sheath, the oligodendroglial membrane wrapped around long projecting axons.  
79 Neurodevelopment and especially the generation of myelin-generating cells are controlled by  
80 thyroid hormones (THs). Many chemicals, including PFOS and PFOA, through their TH  
81 disrupting effects could induce adverse effects on brain development, thus leading to  
82 neurodevelopmental disorders. In particular, the generation of mature myelinating  
83 oligodendrocytes depends on TH throughout life, from early development to adulthood. Previous  
84 work in the adult mouse demonstrated that a transient lack of TH enhanced the generation of

85 oligodendrocyte precursors (OPCs), derived from neural stem cells (NSCs) within the murine  
86 subventricular zone (SVZ). Moreover, these newly-generated OPCs are capable to functionally  
87 rescue nerve conduction after a demyelinating insult (Remaud et al., 2017), suggesting that exposure  
88 to any TH-disrupting chemicals could alter the regeneration of myelin, and may interfere with  
89 multiple sclerosis (MS) pathophysiology.

90 An unexplained increasing prevalence and incidence of MS occurred over the last 30 years (Magyari  
91 & Sorensen, 2019; Walton et al., 2020) with in addition a female/male sex ratio shifting from 2/1  
92 to 3/1 for relapsing MS and even to 4/1 in some countries (Walton et al., 2020). In parallel, the  
93 quantity and diversity of chemicals used in our direct environment have considerably increased  
94 since 1970 (UNEP, 2012), leading to constant human exposure, from early development to aging.  
95 Among these industrial chemicals, PFAS are well established to interfere with TH signaling  
96 (Coperchini et al., 2020; Davidsen et al., 2022) and thus, constitute potential environmental cues  
97 that could disrupt TH-dependent processes as oligodendrogenesis and remyelination.

98 We investigated the adverse effects of these two perfluorooctanic acids on oligodendrogenesis and  
99 remyelination processes from cellular to behavioral levels. We demonstrated that in response to  
100 experimental demyelination PFOS, but not PFOA, impaired myelin regeneration by reducing the  
101 number of mature myelinating oligodendrocytes, together with functional consequences on  
102 sensory-motor behavior well-known to be linked to remyelination capacities. Our work combined  
103 *ex vivo* (organotypic cerebellar slice cultures) and *in vivo* approaches in two groups of vertebrates  
104 (mice and xenopus). This original approach allowed us to establish a comparative and evolutionary  
105 perspective of the action of PFAS on myelin physiology, opening to novel perspectives on the role  
106 of some environmental toxicants as a potential causative factor of some CNS demyelinating  
107 diseases such as MS.

108

## 109 **2. Materials and methods**

### 110 **2.1. Animals**

111           **2.1.1. Mice**

112    C57/BL6 gestant females were purchased from Janvier (Le Genest-Saint-Isle, France) and kept in  
113    ventilated cages under a 12:12 h light-dark cycle in our animal facilities (agreement # A75-13-19.  
114    Experiments were conducted with respect to the European Union regulations and have been  
115    approved by the ethical committee of the French Ministry of Higher Education and Research  
116    (approval number Ce5/2010/025) (APAFIS #6269).

117    *In vivo* exposure to either PFOS or PFOA was induced by giving dams drinking water containing  
118    20mg/L either PFOA or PFOS during a period corresponding to E15-p21 for the progeny. The  
119    bottle was renewed every three days. All experiments were approved by the ComEth ethical board  
120    (Project number APAFIS #21591-2019021815565069v7) and performed in strict accordance with  
121    European Directive 2010/63/EU.

122

123           **2.1.2. Xenopus**

124    All experiments were performed on stage 48 to 50 *Xenopus laevis* tadpoles staged according to  
125    Nieuwkoop and Faber normal tables (Nieuwkoop PD, Faber J., s. d.). Tadpoles were obtained by  
126    natural mating of pairs of adults, selected from our colony of either transgenic Tg(*Mbp:GFP-ntf*) or  
127    wild type raised in our animal facility (agreement # A75-13-19). Handling of animals and functional  
128    tests have been previously detailed (Henriet et al., 2023). Animal care was in accordance with  
129    institutional and national guidelines. All animal procedures conformed to the European  
130    Community Council 1986 directive (86/609/EEC) as modified in 2010 (2010/603/UE) and have  
131    been approved by the ethical committee of the French Ministry of Higher Education and Research  
132    (APAFIS#5842-2016101312021965).

133

134           **2.2. LC-MS/MS analysis**

135 First, myelin of CTL, PFOS- and PFOA-exposed p21 mice were isolated following Percoll<sup>®</sup>  
136 gradient cell separation from enzymatically dissociated brain tissue as previously described in  
137 (Moyon et al., 2021).

138 The internal standard M8PFOA was purchased from Wellington Laboratories (Canada). HPLC  
139 grade solvents were purchased from Merck and VWR.

140 PFOS and PFOA were extracted from myelin and serum using protein precipitation method.  
141 Briefly, 50µl of serum or 100µl of myelin in Percoll<sup>®</sup> were supplemented with 7 volumes of  
142 acetonitrile and 10ng of M8PFOA internal standard. Samples were sonicated for 5min and proteins  
143 allowed to precipitate at 4°C for 1h. Samples were centrifuged at 20 000g for 20min at 4°C and the  
144 supernatant dried and resuspended in 50µl of methanol/water (1:1 v/v).

145 PFAS were quantified by LC-ESI/MS/MS using a Prominence UFLC (Shimadzu, Tokyo, Japan)  
146 and QTrap 4000 mass spectrometer (AB Sciex, Framingham, MA, USA) equipped with a turbo  
147 spray ion source (450°C) combined with an LC20AD HPLC system, a SIL-20AC autosampler  
148 (Shimadzu, Kyoto, Japan) and the Analyst 1.5 data acquisition system (AB Sciex, Framingham,  
149 MA, USA). PFAS were ionized in negative mode. Samples (4µl) were injected to a C18 Ascentis  
150 column (2.7µm, 2.1x150mm, Merck). Mobile phases consisted of (A) 2mM ammonium acetate and  
151 (B) acetonitrile. The gradient started with 30% of phase B and increased to 65% over 3min  
152 maintained for 1min and then increased to 100% over 3min. PFAS were detected using scheduled  
153 multiple reaction monitoring using sulfate fragmentation for PFOS 499<80 or neutral loss for  
154 PFOA 413<369 and M8PFOA 421<376. Myelin PFAS concentrations were estimated based on  
155 previously published rat brain composition (Norton & Poduslo, 1973): myelin weight was  
156 estimated at around 20-25% of total dry brain weight and brain water content at around 80% of  
157 total weight. Using these estimates and starting with mice brain total weight of 300mg, myelin  
158 weight was estimated at 13.5mg (300x0.2x0.225). Finally, PFAS weight was quantified in total  
159 Percoll<sup>®</sup> fraction and divided by total myelin estimated weight.

160

161        **2.3. Mouse cerebellar slice preparation**

162        The procedure is described in the supporting information (see also (Thetiot et al., 2019)

163

164        **2.4. Quantification of myelin on mouse cerebellar slice preparation**

165        The procedure is described in the supporting information and (Ronzano et al., 2021)

166

167        **2.5. Antibodies**

168        List of antibodies is provided in the supporting information

169

170        **2.6. Immunolabeling and quantification on brain section**

171        The procedure is described in the supporting information

172

173        **2.7. Quantification of GFP+ cells**

174        GFP was detected directly by fluorescence in live *Tg(Mbp:GFP-*ntr*)* transgenic *Xenopus* embryos

175        using an AZ100 Nikon Zoom Macroscope. The procedure is described in the supporting

176        information (see also (Kaya et al., 2012) and (Henriet et al., 2023).

177

178        **2.8. Behavioral testing**

179        The tests have been previously described (Henriet et al., 2023). The procedure is described in the

180        supporting information.

181

182        **2.9. Statistical Analysis**

183        We used Prism GraphPad software (GraphPad Prism version 8) for statistical analyses. Data

184        presented are the mean  $\pm$  SEM of number of GFP+ cells counted on at least 16 tadpoles per

185        condition. For the analysis of two groups, an unpaired two-tailed Student t-test or a Mann-Whitney

186        test were applied. For more than two group analyses, a one-way ANOVA with Tukey's multiple



187 comparison test or a Kruskal-Wallis with Dunn's multiple comparisons test were applied. Statistical  
188 significance was defined as: \* $p < 0.05$ , \*\* $p < 0.01$ , and \*\*\* $p < 0.001$ .

189

190

### 191 **3. Results**

#### 192 **3.1. In vivo accumulation into the myelin sheath of PFOS, and to a lesser extent of** 193 **PFOA**

194 PFAS are lipo-soluble compounds that accumulate into adipose tissue and other lipid rich-  
195 structures (Lee et al., 2017; Mamsen et al., 2019). Knowing the high lipid content of myelin sheath,  
196 oligodendroglial membrane wrapped around long projecting axons, we first interrogated whether  
197 a perinatal exposure to PFAS could accumulate into the pup's myelin sheath. To test this possibility,  
198 either perfluorooctane sulfonate (PFOS) or perfluorooctanoic acid (PFOA) (20mg/L, each) was  
199 added to the drinking water of dams, during gestation from embryonic day 15 (E15) and during  
200 lactation till weaning, i.e., postnatal day 21 (p21) (**Fig. 1A**). At the end of PFAS exposure, similar  
201 level of either PFOS or PFOA were detected in the plasma of mothers ( $3.5 \pm 0.72$  and  $4.1 \pm 0.18$   
202  $\mu\text{g/ml}$ , respectively; **Fig. 1B**) and of pups ( $1.63 \pm 0.19$  and  $0.86 \pm 0.13 \mu\text{g/ml}$ , respectively; **Fig. 1D**),  
203 indicating that both PFAS was similarly absorbed from the drinking water to the mother plasma  
204 and from the mother's milk to the pup's serum. On p21 myelin was bulk-purified from dams and  
205 pups' brain by centrifugation on a Percoll<sup>®</sup> gradient and collected myelin pellets were analyzed by  
206 LC-mass spectrometry. Both PFAS were recovered in the mother's myelin fraction and 4.7 less for  
207 PFOS and 10 time less for PFOA in the pups' myelin (**Fig. 1C, E**; and **supplementary Table 1**).  
208 Despite equivalent plasmatic levels, PFOS accumulated 133 time more than PFOA into the pups'  
209 myelin ( $2.80 \pm 0.37$  vs  $0.021 \pm 0.003 \text{ ng/g tissue}$ ; Mann-Whitney test,  $p=0.0002$ ), (**Fig. 1E**). Of note,  
210 low levels of both PFOS and PFOA were detected in the myelin of control pups, i.e., pups in which  
211 mother had been drinking normal tap water (**Fig. 1E**). To find the potential source of PFAS  
212 contamination in control animals we assayed the food pellets, litter and water. While hardly

213 detectable in food pellets and litter, definite amount was present in the tap water (**supplementary**  
214 **Table 1**).

### 215 **3.2. Exposure to PFOS, but not PFOA, altered oligodendrogenesis and myelination**

216 We then examined whether the perinatal exposure to PFOS or PFOA affected the generation of  
217 new OPCs derived from the p21 dorsal SVZ niche by immunohistochemistry using an antibody  
218 directed against the oligodendroglial transcription factor OLIG2 (**Fig. 2A-D**). We observed that  
219 PFOS, but not PFOA significantly increased the density of OLIG2+ oligodendrocyte precursor  
220 cells (OPCs) (Dunn's test,  $0.027 \leq p \leq 0.04$ ; **Fig. 2E**). In addition, the density of oligodendroglia  
221 lineage population at varying maturity was assessed in the corpus callosum above the dorsal SVZ  
222 by double-immunostaining with anti-OLIG2 to label all oligodendrocyte-lineage cells and a marker  
223 of mature oligodendrocytes (APC, recognized by CC-1 mAb) (**Fig. 2F-I**). We calculated ratios of  
224 OLIG2+/CC1+ co-expressing mature oligodendrocytes vs. immature OPCs expressing OLIG2  
225 alone (**Fig. 2J**). About 70% of the OLIG2+ oligodendroglial cells also expressed CC1 in control  
226 mice. In PFOS-exposed animals, mature OLIG2+/CC1+ oligodendrocyte density decreased  
227 significantly (57%) in favor of an increase in the density of immature OPCs in the corpus callosum  
228 (Dunn's test,  $p=0.006$ ). The decrease in density of mature oligodendrocyte translated in a  
229 significant reduction of PLP myelin immuno-staining (Proteolipid Protein, PLP, the major myelin  
230 protein; **Fig. 2K-M**) (20% reduction, Dunn's test,  $p=0.004$ ) in the corpus callosum of PFOS-  
231 treated brains (**Fig. 2N**). Of note, on PFOA-exposed pups no significant effect was detected on  
232 oligodendrocyte differentiation (Dunns' test,  $p>0.05$ ; **Fig. 2E, J, N**).

233

### 234 **3.3. PFOS altered remyelination in organotypic mouse cerebellar slices**

235 Having shown the bioaccumulation of PFAS into the myelin sheath and that PFOS exposure  
236 impaired the generation of mature oligodendrocytes, we questioned whether PFAS affected  
237 remyelination. We used organotypic cerebellar slices from postnatal wild-type mice to better  
238 analyze the cellular effects of PFAS on remyelination *ex vivo*. Cerebellar slices from P9 wild type

239 were cultured as described (Thetiot et al., 2019) (**Fig. 3A**). After 6 days in culture, cerebellar slices  
240 were transiently demyelinated for 15h using lysophosphatidylcholine (LPC). After LPC removal,  
241 endogenous remyelination of Purkinje cell axons occurred and slices were incubated for 4 days  
242 with decreasing concentrations of either PFOA ( $10^{-7}$  to  $10^{-9}$ M) or PFOS ( $10^{-6}$  to  $10^{-11}$ M). The extent  
243 of remyelination was measured by double -labeling of myelin and Purkinje axons using anti-PLP  
244 and anti-Calbindin antibodies, respectively (**Fig. 3B-G**). The remyelination index was measured  
245 using an ImageJ macro language that allows a fast and an unbiased automated quantification of  
246 cerebellar myelinated axons (Ronzano et al., 2021). We observed that PFOS at concentration  
247 between  $10^{-8}$  to  $10^{-10}$  M, inhibited remyelination by 25-30% compared to control (Dunn's test:  
248  $0.001 \leq p \leq 0.02$ ), but not for the highest ( $10^{-6}$  or  $10^{-7}$ M) nor the lowest ( $10^{-11}$  M) concentration (**Fig.**  
249 **3H**). This U shape dose-response curve is a characteristic of molecules acting on nuclear receptors  
250 (Vandenberg et al., 2012). Knowing the important role of thyroid hormone in oligodendrogenesis  
251 and myelin formation (Bernal, 2000; Remaud et al., 2017; Zorrilla Veloz et al., 2022), we first  
252 verified that in our *ex vivo* cerebellar culture explant demyelinated model, remyelination was strongly  
253 dependent on thyroid hormone signaling, increased by addition of T3 (10nM) in the culture  
254 medium and inhibited by addition of NH-3 a potent thyroid hormone receptor (THR) antagonist  
255 (**Supplementary Fig. 1**). (NH-3 is a derivative of the selective thyromimetic GC-1, which inhibits  
256 binding of thyroid hormones to their receptor) (Lim et al., 2002) . We then interrogated whether  
257 the effect of PFOS could be reversed by T3 addition. Indeed, when slices were exposed to the  
258 most deleterious dose of PFOS ( $10^{-8}$ M), addition of T3 (10nM) allowed to return the levels of  
259 remyelination close to the control (**Fig. 3H**), strongly suggesting that PFOS negative effect on  
260 remyelination could involve modulation of TH action. In contrast to data generated with PFOS,  
261 no significative effect of PFOA exposure was observed (**Fig. 3I**; Kruskal-Wallis test,  $p > 0.05$ ).

262

263 **3.4. Functional consequences of PFAS-induced impaired remyelination in Xenopus**

264 We then interrogated the functional consequence of PFOS bioaccumulation. In a first set of  
265 experiments we took advantage of our transgenic Tg(*Mbp:GFP-ntr*) *Xenopus* line to test the  
266 possible deleterious effect of PFAS on myelin biology and more specifically the endogenous repair  
267 potential. In this transgenic line, the GFP reporter is expressed specifically and selectively in myelin  
268 forming oligodendrocytes. In addition, due to the nitroreductase (NTR) transgene -fused to the  
269 GFP reporter- myelinating oligodendrocytes were ablated following addition of metronidazole  
270 (MTZ) into the swimming water (**Fig. 4A- F**). The hydroxylamine product of the NTR-induced  
271 reduction of the NO<sub>2</sub> moiety of MTZ is highly toxic, leading to an oligodendrocyte cell death.  
272 Depending on the concentration and duration of MTZ exposure the extent of oligodendrocytes  
273 ablation is more or less severe and was best quantified in the optic nerve. In stage 48-50 the number  
274 of GFP+ oligodendrocyte was very stable and reproducible ( $16.54 \pm 0.64$ ; n=237) and was severely  
275 decreased at the end of the demyelination treatment -10 days exposure to MTZ (10mM)- ( $4.25 \pm$   
276  $0.92$ ; n=176)(**Fig. 4C-D**). Following this demyelination period when tadpoles were returned to  
277 normal water spontaneous recovery occurred. After 3 days the number of GFP+ oligodendrocytes  
278 was  $13.98 \pm 0.57$  (n=44) (**Fig. 4E, G**) and after 8 days recovery was complete or almost complete.  
279 We have previously shown that the number of GFP+ oligodendrocytes per optic nerve was a  
280 faithful and reliable index of myelin content, whether at the end of the demyelination period as  
281 well as during remyelination and that this model was sensitive enough to identify among a panel of  
282 compounds added into the swimming water the ones that had the potential to promote  
283 remyelination(Kaya et al., 2012; Mannioui et al., 2018). To examine the effect of PFAS on  
284 remyelination, at the end of the MTZ-induced demyelination tadpoles were exposed during the 3  
285 days period of recovery to decreasing doses ranging between  $10^{-5}$  M and  $10^{-11}$  M of either PFOA  
286 or PFOS (**Fig. 4A, F, G, H**). Compared to control levels, i.e., level of spontaneous recovery, no  
287 significant effect on the number of oligodendrocytes was observed at any of PFOA  
288 concentrations tested (Kruskal-Wallis test,  $p > 0.05$ ; **Fig. 4H**). In contrast, PFOS induced a maximal  
289 37.2% inhibition of recovery for a concentration of 10nM (Dunn's test:  $p < 0.0001$ ; **Fig. 4G**). The

290 inhibitory effect was dose dependent with a U-shape curve, with no effect for the highest ( $10^{-5}$  M)  
291 or lowest concentration ( $10^{-11}$  M) and a maximum effect for  $10^{-8}$  M.

292 We questioned the functional consequences of the decrease in the number of mature myelin  
293 forming oligodendrocytes. To evaluate the motor functions of the tadpole we measured the  
294 distance traveled for a given period of time and the speed of swimming. After 10 days in MTZ  
295 (10mM) demyelinated animals swam a shorter distance than before demyelination:  $57.3 \pm 3.12$  cm  
296 vs  $10.13 \pm 1.39$  cm at D0 and D10, respectively (mean  $\pm$  SEM, n=63 (D0), n=36 (D10); Dunn's test:  
297  $p = <0.0001$ ). Similarly, the average speed of swimming of Tg(*Mbp:GFP-ntf*) tadpoles ( $1.67 \pm 0.09$   
298  $\text{cm}\cdot\text{s}^{-1}$ ) was significantly decreased at the end of the demyelination treatment ( $0.30 \pm 0.04$   $\text{cm}\cdot\text{s}^{-1}$ )  
299 (mean  $\pm$  SEM, n=63 (D0), n=36 (D10); Dunn's test:  $p = <0.0001$ ).

300 At R3, the nearly complete recovery in the number of GFP+ cells measured in the optic nerve  
301 paralleled an improvement in the average speed and the distance traveled over a period of 30s  
302 (distance:  $44 \pm 4.8$  cm; speed:  $1.28 \pm 0.14$   $\text{cm}\cdot\text{s}^{-1}$ ; n=14). In contrast, tadpoles exposed to PFOS  
303 (10nM) did not recover (distance:  $18.02 \pm 4.36$  cm; speed:  $0.53 \pm 0.13$   $\text{cm}\cdot\text{s}^{-1}$ ; n=9; Dunn's test:  
304  $p=0.004$ ) (**Fig. 4 I, J**).

305 Since the level of demyelination was evaluated by the number of mature GFP+ oligodendrocytes  
306 per optic nerve, we reasoned that a demyelination, or failure of remyelination of optic nerve axons  
307 must translate by a loss of vision, like optic neuritis in human. To test whether a demyelination of  
308 optic nerve axons translated in tadpoles into a vision loss we developed an index of visual avoidance  
309 of a virtual collision (Henriet et al., 2023). At the end of the demyelination period, tadpoles had  
310 lost the capability to avoid the threatening stimulus represented by the virtual collision with the  
311 black dot. The avoidance index measured at D0 significantly decreased after 10 days of  
312 demyelination from  $69.76 \pm 1.4\%$  to  $22.27 \pm 2.89\%$ ; n=63 (D0), n=36 (D10); (mean  $\pm$  SEM;  
313 Dunn's test:  $p = <0.0001$ ) (**Fig. 4K**). Three days after MTZ exposure was stopped, control animals  
314 recovered rapidly with avoidance index of  $50.28 \pm 4.35\%$  (n= 14) while PFOS treated tadpoles did  
315 not recover (avoidance:  $20.43 \pm 4.88\%$ ; n=9; Dunn's test:  $p=0.0007$ ) (**Fig. 4K**). In contrast to

316 PFOS, and similar to our observations in mouse cerebellar slices, in xenopus PFOA had no  
317 noticeable effect on cellular remyelination (**Fig. 4H**) and did not alter spontaneous functional  
318 repair (**Fig. 4I-K**).

319

## 320 4. Discussion

### 321 4.1. Comparative analysis of PFOA and PFOS effects

322 PFOA and PFOS were given at 20mg/L via drinking water to gestant and lactating mothers and  
323 both compounds were detected at similar levels in the serum of p21 pups by LC-MS/MS, showing  
324 placental transfer of PFAS as previously reported (Chen et al., 2017). The high concentration of  
325 PFAS in blood could be also explained by the high affinity of PFAS for plasma albumin (Guy WS,  
326 s. d.). Furthermore, although prenatal exposure to PFOS and PFOA has been usually associated  
327 with lower birth weight in humans (Fei et al., 2007) and rodents (Lau et al., 2004, 2006)(for PFOS  
328 (2–20 mg/kg) and PFOA (1–40 mg/kg), we did not observe any significant modifications of birth  
329 weight and postnatal survival in both PFAS-treated groups ( $11.21 \pm 0.32\text{g}$  and  $10.98 \pm 0.41\text{g}$  for  
330 PFOS and PFOA, respectively) compared to controls pups ( $11.72 \pm 0.47\text{g}$ ), suggesting that *in vivo*  
331 PFAS exposure at 20mg/L has limited adverse health effects on mouse perinatal development.

332 A large part of the literature is focused on the association of PFAS with protein-rich tissues (liver  
333 and blood) rather than lipids (Jones et al., 2003). In human, PFAS are mostly detected in lung and  
334 liver and to a lesser degree in the central nervous system (Mamsen et al., 2019). Cerebral barriers  
335 may limit PFAS entry into the brain although blood-brain-barrier disruption could be a mechanism  
336 facilitating PFOS entry in brain (35), as occurring in inflammatory CNS diseases. Interestingly, the  
337 levels and patterns of PFAS have been reported in several brain regions (i.e., notably hypothalamus,  
338 striatum, cerebellum, cortex of polar bears (Greaves et al., 2013) but, to our knowledge,  
339 accumulation of PFAS in the white matter has never been clearly identified. Our study emphasizes  
340 not only a preferential PFAS accumulation into the myelin, but also a higher occurrence of PFOS  
341 than PFOA.

342 The differential accumulation into the myelin sheath of PFOS compared to PFOA may result from  
343 different, not exclusive factors: i) PFOS is a higher hydrophobic compound with its SO<sub>3</sub>H  
344 function that may facilitate its incorporation into the lipid-rich sheaths; ii) although the existing  
345 literature shows that PFAS biotransformation is minimal or absent (Vanden Heuvel et al., 1991),  
346 PFOA exhibits much faster depuration than PFOS (Benskin et al., 2009; Hassell et al., 2020) and  
347 PFOS has a greater half-life in tissues than PFOA (Li et al., 2018). In addition, competition for TH  
348 binding sites on serum transport proteins, such as transthyretin (TTR), which binds and distributes  
349 TH to brain cells *via* the cerebrospinal fluid may facilitate PFAS brain entry, notably in brain cells  
350 closed to the ventricles (Vancamp et al., 2019). In this context, it is noteworthy that PFOS has a  
351 higher TTR-binding potency compared to PFOA (Weiss et al., 2009), which may favor PFOS  
352 delivery to neural cells.

353

#### 354 **4.2. The myelinotoxic and gliotoxic mechanisms of PFOS**

355 We demonstrated that PFOS accumulated into the myelin fraction of p21 pups. Further work is  
356 needed to determine whether accumulation of PFAS into the myelin sheath could alter myelin  
357 functions. In particular, a lipidome and proteome map of myelin membranes combined to  
358 ultrastructure analysis would allow to better understand the molecular anatomy of the potential  
359 PFOS-induced myelin deterioration.

360 We also showed *in vivo* that PFOS impaired oligodendrocyte lineage formation, notably the  
361 differentiation of mature myelinating oligodendrocytes from neural stem cells localized within the  
362 SVZ. The pool of immature precursors is increased at the expense of differentiated CC1+ and  
363 PLP+ oligodendrocytes within the corpus callosum, the white matter just above the SVZ where  
364 newly generated SVZ-derived OPCs migrate (Remaud et al., 2017). A similar phenotype has been  
365 described in several genetic and pharmacological models deficient for the TH signaling (Gothié et  
366 al., 2017; Luongo et al., 2021; Remaud et al., 2017; Vancamp et al., 2019), strongly suggesting that  
367 these PFOS-related effects involved modulation of TH action. Furthermore, myelin deposition is



368 a well-established T3-dependent process in all vertebrates (Barres et al., 1994; Billon et al., 2001).  
369 Accordingly, addition of T3 rescued the negative effect of PFOS ( $10^{-8}$  M) on endogenous myelin  
370 repair *ex vivo*. The ability of PFAS, notably PFOS, to disturb TH biosynthesis and metabolism is  
371 well documented in animal models (Yu et al., 2009) and humans (Boas et al., 2012; Melzer et al.,  
372 2010), making PFOS a TH-disrupting chemical.  
373 The activity of PFOS on oligodendrogenesis and myelination in the CNS could also be linked to  
374 its interaction with many others nuclear hormone receptors (i.e., PPAR, estrogen or androgen  
375 pathways (Villeneuve et al., 2023) well-known to be modulated by PFOS in peripheral tissues (Du  
376 et al., 2013; Wan et al., 2012) and to regulate myelin homeostasis (Hussain et al., 2013; Montani et  
377 al., 2018; Taylor et al., 2010).

378

#### 379 **4.3. Is there a link between PFOS exposure during the perinatal period and the** 380 **prevalence of multiple sclerosis?**

381 We have previously demonstrated that the perinatal period is a critical developmental window  
382 sensitive to endocrine disruption that could lead to neuroglionic and behavioral permanent  
383 alterations in the adult (Vancamp et al., 2022, 2023). This work is in line with “the Developmental  
384 Origins of Health and Disease” (DOHaD) theory involving that early exposure to endocrine  
385 disrupting chemicals could induce irreversible damage later in life. It has been suggested that  
386 Persistent Organic Pollutants (POP) exposure, which includes PFAS, during the perinatal period  
387 may play a role in several neurological disorders such as ADHD, Autism Spectrum Disorder,  
388 Alzheimer’s Disease, Parkinson’s Disease. A link with myelin disorders has not been hypothesized  
389 (for review see (Grova et al., 2019) and to our knowledge, PFAS early exposure has not been  
390 established as a risk factor for MS, yet. A recent study, however, pointed out that POP exposure,  
391 including PFAS, decreased some myelination related genes (Yadav et al., 2022).

392 Aside from genetic factors, which only explain a fraction of the disease risk, and Epstein-Barr virus  
393 (EBV) infection, which increases by approximately 30 fold the risk of developing MS (Bjornevik



394 et al., 2022), some environmental MS risk factors, - such as smoking, low vitamin D levels caused  
395 by insufficient sun exposure and/or dietary intake, obesity during adolescence-, have been  
396 identified and might participate to the increased incidence of the disease detected during the last  
397 decades, with odds ratio not exceeding 2. Increased exposure to EDC, notably PFOS, during the  
398 last decades is striking, and our work highlights their accumulation in CNS myelin on the one hand,  
399 their impact on oligodendroglial fate during development and on myelin integrity in the adult CNS,  
400 on the other hand. Therefore, although caution is needed because our data on PFAS accumulation  
401 are derived from mouse brains, PFOS exposure – and more largely EDC - might represent a novel  
402 and major risk factor for MS development, a hypothesis in line with inside-out pathogenic concept  
403 for MS, where initial myelin alterations can trigger an autoimmune CNS pathology (Luchicchi et  
404 al., 2021). Along this line, it is conceivable that PFOS accumulation into the myelin sheath, by  
405 modifying the lipid composition or by intercalating within the lipid bilayer, might alter the myelin  
406 biophysical properties, fragilize the membrane and its stability. EDCs are chemicals that either  
407 mimic or block endogenous hormones and thus disrupt the normal hormone homeostasis. So,  
408 there may be a possibility to counteract their deleterious effects by using agonists of the pathway  
409 they are perturbing. But in our opinion, the future way to go is prevention. Our hope is that our  
410 pioneer work will lead many other colleagues towards this avenue of research and therefore create  
411 a pressure on environmental protection authorities, not only to prohibit the manufacturing of these  
412 molecules, but also to develop systems to protect the population from the existing persistent  
413 pollutants and promote the depollution of contaminated soils and waters.

414

## 415 **5. Acknowledgements**

416 We thank Drs Francine Acher, Dominique Padovani and Erwan Galardon for precious advises  
417 on different chemical properties between PFOS and PFOA, Drs Allan Tobin and Vincent Laudet  
418 for careful reading and helpful advices on the manuscript and David Akbar and ICM-QUANT  
419 imaging facility for help in generating micrograph illustrations. We also thank Fabien Uridat and

420 Stéphane Sosinsky (UMR 7221) for excellent animal care. We thank Pamela Lein for supplying  
421 the NH3 (Walter et al., 2021).

422

## 423 **6. References**

424 Barres, B. A., Lazar, M. A., & Raff, M. C. (1994). A novel role for thyroid hormone,  
425 glucocorticoids and retinoic acid in timing oligodendrocyte development.

426 *Development (Cambridge, England)*, 120(5), 1097-1108.

427 <https://doi.org/10.1242/dev.120.5.1097>

428 Benskin, J. P., De Silva, A. O., Martin, L. J., Arsenault, G., McCrindle, R., Riddell, N.,

429 Mabury, S. A., & Martin, J. W. (2009). Disposition of perfluorinated acid isomers in

430 Sprague-Dawley rats; part 1 : Single dose. *Environmental Toxicology and Chemistry*,

431 28(3), 542-554. <https://doi.org/10.1897/08-239.1>

432 Bernal, J. (2000). Thyroid Hormones in Brain Development and Function. In K. R. Feingold,

433 B. Anawalt, M. R. Blackman, A. Boyce, G. Chrousos, E. Corpas, W. W. de Herder, K.

434 Dhatariya, J. Hofland, K. Dungan, J. Hofland, S. Kalra, G. Kaltsas, N. Kapoor, C.

435 Koch, P. Kopp, M. Korbonits, C. S. Kovacs, W. Kuohung, ... D. P. Wilson (Éds.),

436 *Endotext*. MDText.com, Inc. <http://www.ncbi.nlm.nih.gov/books/NBK285549/>

437 Billon, N., Tokumoto, Y., Forrest, D., & Raff, M. (2001). Role of thyroid hormone receptors

438 in timing oligodendrocyte differentiation. *Developmental Biology*, 235(1), 110-120.

439 <https://doi.org/10.1006/dbio.2001.0293>

440 Bjornevik, K., Cortese, M., Healy, B. C., Kuhle, J., Mina, M. J., Leng, Y., Elledge, S. J.,

441 Niebuhr, D. W., Scher, A. I., Munger, K. L., & Ascherio, A. (2022). Longitudinal

442 analysis reveals high prevalence of Epstein-Barr virus associated with multiple

443 sclerosis. *Science (New York, N.Y.)*, 375(6578), 296-301.

444 <https://doi.org/10.1126/science.abj8222>

- 445 Boas, M., Feldt-Rasmussen, U., & Main, K. M. (2012). Thyroid effects of endocrine  
446 disrupting chemicals. *Molecular and Cellular Endocrinology*, 355(2), 240-248.  
447 <https://doi.org/10.1016/j.mce.2011.09.005>
- 448 Calafat, A. M., Kato, K., Hubbard, K., Jia, T., Botelho, J. C., & Wong, L.-Y. (2019). Legacy  
449 and alternative per- and polyfluoroalkyl substances in the U.S. general population :  
450 Paired serum-urine data from the 2013-2014 National Health and Nutrition  
451 Examination Survey. *Environment International*, 131, 105048.  
452 <https://doi.org/10.1016/j.envint.2019.105048>
- 453 Caporale, N., Leemans, M., Birgersson, L., Germain, P.-L., Cheroni, C., Borbély, G.,  
454 Engdahl, E., Lindh, C., Bressan, R. B., Cavallo, F., Chorev, N. E., D'Agostino, G. A.,  
455 Pollard, S. M., Rigoli, M. T., Tenderini, E., Tobon, A. L., Trattaro, S., Troglia, F.,  
456 Zanella, M., ... Testa, G. (2022). From cohorts to molecules : Adverse impacts of  
457 endocrine disrupting mixtures. *Science (New York, N.Y.)*, 375(6582), eabe8244.  
458 <https://doi.org/10.1126/science.abe8244>
- 459 Chen, F., Yin, S., Kelly, B. C., & Liu, W. (2017). Chlorinated Polyfluoroalkyl Ether Sulfonic  
460 Acids in Matched Maternal, Cord, and Placenta Samples : A Study of Transplacental  
461 Transfer. *Environmental Science & Technology*, 51(11), 6387-6394.  
462 <https://doi.org/10.1021/acs.est.6b06049>
- 463 Coperchini, F., Croce, L., Ricci, G., Magri, F., Rotondi, M., Imbriani, M., & Chiovato, L.  
464 (2020). Thyroid Disrupting Effects of Old and New Generation PFAS. *Frontiers in*  
465 *Endocrinology*, 11, 612320. <https://doi.org/10.3389/fendo.2020.612320>
- 466 Davidsen, N., Ramhøj, L., Lykkebo, C. A., Kugathas, I., Poulsen, R., Rosenmai, A. K.,  
467 Evrard, B., Darde, T. A., Axelstad, M., Bahl, M. I., Hansen, M., Chalmel, F., Licht, T.  
468 R., & Svingen, T. (2022). PFOS-induced thyroid hormone system disrupted rats

- 469 display organ-specific changes in their transcriptomes. *Environmental Pollution*  
470 (*Barking, Essex: 1987*), 305, 119340. <https://doi.org/10.1016/j.envpol.2022.119340>
- 471 Demeneix, B. (2014). *Losing our mind : How environmental pollution Impairs human*  
472 *intelligence and mental health*. Oxford University press.
- 473 Du, G., Hu, J., Huang, H., Qin, Y., Han, X., Wu, D., Song, L., Xia, Y., & Wang, X. (2013).  
474 Perfluorooctane sulfonate (PFOS) affects hormone receptor activity, steroidogenesis,  
475 and expression of endocrine-related genes in vitro and in vivo. *Environmental*  
476 *Toxicology and Chemistry*, 32(2), 353-360. <https://doi.org/10.1002/etc.2034>
- 477 Fei, C., McLaughlin, J. K., Tarone, R. E., & Olsen, J. (2007). Perfluorinated chemicals and  
478 fetal growth : A study within the Danish National Birth Cohort. *Environmental Health*  
479 *Perspectives*, 115(11), 1677-1682. <https://doi.org/10.1289/ehp.10506>
- 480 Gothié, J.-D., Demeneix, B., & Remaud, S. (2017). Comparative approaches to understanding  
481 thyroid hormone regulation of neurogenesis. *Molecular and Cellular Endocrinology*,  
482 459, 104-115. <https://doi.org/10.1016/j.mce.2017.05.020>
- 483 Greaves, A. K., Letcher, R. J., Sonne, C., & Dietz, R. (2013). Brain region distribution and  
484 patterns of bioaccumulative perfluoroalkyl carboxylates and sulfonates in east  
485 greenland polar bears (*Ursus maritimus*). *Environmental Toxicology and Chemistry*,  
486 32(3), 713-722. <https://doi.org/10.1002/etc.2107>
- 487 Grova, N., Schroeder, H., Olivier, J.-L., & Turner, J. D. (2019). Epigenetic and Neurological  
488 Impairments Associated with Early Life Exposure to Persistent Organic Pollutants.  
489 *International Journal of Genomics*, 2019, 2085496.  
490 <https://doi.org/10.1155/2019/2085496>
- 491 Guy WS, G. W., Taves DR, Brey WS Jr. (s. d.). Organic fluorocompounds in human plasma :  
492 Prevalence and characterization. In *Biochemistry Involving Carbon—Fluorine Bonds*.  
493 (p. pp 117-134).

- 494 Hassell, K. L., Coggan, T. L., Cresswell, T., Kolobaric, A., Berry, K., Crosbie, N. D.,  
495 Blackbeard, J., Pettigrove, V. J., & Clarke, B. O. (2020). Dietary Uptake and  
496 Depuration Kinetics of Perfluorooctane Sulfonate, Perfluorooctanoic Acid, and  
497 Hexafluoropropylene Oxide Dimer Acid (GenX) in a Benthic Fish. *Environmental*  
498 *Toxicology and Chemistry*, 39(3), 595-603. <https://doi.org/10.1002/etc.4640>
- 499 Henriet, E., Martin, E. M., Jubin, P., Langui, D., Mannioui, A., Stankoff, B., Lubetzki, C.,  
500 Khakhalin, A., & Zalc, B. (2023). Monitoring recovery after CNS demyelination, a  
501 novel tool to de-risk pro-remyelinating strategies. *Brain: A Journal of Neurology*,  
502 awad051. <https://doi.org/10.1093/brain/awad051>
- 503 Houde, M., Douville, M., Giraudo, M., Jean, K., Lépine, M., Spencer, C., & De Silva, A. O.  
504 (2016). Endocrine-disruption potential of perfluoroethylcyclohexane sulfonate  
505 (PFECHS) in chronically exposed *Daphnia magna*. *Environmental Pollution (Barking,*  
506 *Essex: 1987)*, 218, 950-956. <https://doi.org/10.1016/j.envpol.2016.08.043>
- 507 Hussain, R., Ghoumari, A. M., Bielecki, B., Steibel, J., Boehm, N., Liere, P., Macklin, W. B.,  
508 Kumar, N., Habert, R., Mhaouty-Kodja, S., Tronche, F., Sitruk-Ware, R., Schumacher,  
509 M., & Ghandour, M. S. (2013). The neural androgen receptor : A therapeutic target for  
510 myelin repair in chronic demyelination. *Brain: A Journal of Neurology*, 136(Pt 1),  
511 132-146. <https://doi.org/10.1093/brain/aws284>
- 512 Jones, P. D., Hu, W., De Coen, W., Newsted, J. L., & Giesy, J. P. (2003). Binding of  
513 perfluorinated fatty acids to serum proteins. *Environmental Toxicology and Chemistry*,  
514 22(11), 2639-2649. <https://doi.org/10.1897/02-553>
- 515 Kaya, F., Mannioui, A., Chesneau, A., Sekizar, S., Maillard, E., Ballagny, C., Houel-Renault,  
516 L., Dupasquier, D., Bronchain, O., Holtzmann, I., Desmazieres, A., Thomas, J.-L.,  
517 Demeneix, B. A., Brophy, P. J., Zalc, B., & Mazabraud, A. (2012). Live imaging of  
518 targeted cell ablation in *Xenopus* : A new model to study demyelination and repair.

- 519            *The Journal of Neuroscience: The Official Journal of the Society for Neuroscience*,
- 520            32(37), 12885-12895. <https://doi.org/10.1523/JNEUROSCI.2252-12.2012>
- 521    Lau, C., Butenhoff, J. L., & Rogers, J. M. (2004). The developmental toxicity of
- 522            perfluoroalkyl acids and their derivatives. *Toxicology and Applied Pharmacology*,
- 523            198(2), 231-241. <https://doi.org/10.1016/j.taap.2003.11.031>
- 524    Lau, C., Thibodeaux, J. R., Hanson, R. G., Narotsky, M. G., Rogers, J. M., Lindstrom, A. B.,
- 525            & Strynar, M. J. (2006). Effects of perfluorooctanoic acid exposure during pregnancy
- 526            in the mouse. *Toxicological Sciences: An Official Journal of the Society of Toxicology*,
- 527            90(2), 510-518. <https://doi.org/10.1093/toxsci/kfj105>
- 528    Lee, Y.-M., Kim, K.-S., Jacobs, D. R., & Lee, D.-H. (2017). Persistent organic pollutants in
- 529            adipose tissue should be considered in obesity research. *Obesity Reviews: An Official*
- 530            *Journal of the International Association for the Study of Obesity*, 18(2), 129-139.
- 531            <https://doi.org/10.1111/obr.12481>
- 532    Li, Y., Fletcher, T., Mucs, D., Scott, K., Lindh, C. H., Tallving, P., & Jakobsson, K. (2018).
- 533            Half-lives of PFOS, PFHxS and PFOA after end of exposure to contaminated drinking
- 534            water. *Occupational and Environmental Medicine*, 75(1), 46-51.
- 535            <https://doi.org/10.1136/oemed-2017-104651>
- 536    Lim, W., Nguyen, N.-H., Yang, H. Y., Scanlan, T. S., & Furlow, J. D. (2002). A thyroid
- 537            hormone antagonist that inhibits thyroid hormone action in vivo. *The Journal of*
- 538            *Biological Chemistry*, 277(38), 35664-35670.
- 539            <https://doi.org/10.1074/jbc.M205608200>
- 540    Luchicchi, A., Hart, B., Frigerio, I., van Dam, A.-M., Perna, L., Offerhaus, H. L., Stys, P. K.,
- 541            Schenk, G. J., & Geurts, J. J. G. (2021). Axon-Myelin Unit Blistering as Early Event
- 542            in MS Normal Appearing White Matter. *Annals of Neurology*, 89(4), 711-725.
- 543            <https://doi.org/10.1002/ana.26014>

- 544 Luongo, C., Butruille, L., Sébillot, A., Le Blay, K., Schwaninger, M., Heuer, H., Demeneix,  
545 B. A., & Remaud, S. (2021). Absence of Both Thyroid Hormone Transporters MCT8  
546 and OATP1C1 Impairs Neural Stem Cell Fate in the Adult Mouse Subventricular  
547 Zone. *Stem Cell Reports*, 16(2), 337-353. <https://doi.org/10.1016/j.stemcr.2020.12.009>
- 548 Magyari, M., & Sorensen, P. S. (2019). The changing course of multiple sclerosis : Rising  
549 incidence, change in geographic distribution, disease course, and prognosis. *Current*  
550 *Opinion in Neurology*, 32(3), 320-326.  
551 <https://doi.org/10.1097/WCO.0000000000000695>
- 552 Mamsen, L. S., Björvang, R. D., Mucs, D., Vinnars, M.-T., Papadogiannakis, N., Lindh, C.  
553 H., Andersen, C. Y., & Dandimopoulou, P. (2019). Concentrations of perfluoroalkyl  
554 substances (PFASs) in human embryonic and fetal organs from first, second, and third  
555 trimester pregnancies. *Environment International*, 124, 482-492.  
556 <https://doi.org/10.1016/j.envint.2019.01.010>
- 557 Mannioui, A., Vauzanges, Q., Fini, J. B., Henriët, E., Sekizar, S., Azoyan, L., Thomas, J. L.,  
558 Pasquier, D. D., Giovannangeli, C., Demeneix, B., Lubetzki, C., & Zalc, B. (2018).  
559 The *Xenopus* tadpole : An in vivo model to screen drugs favoring remyelination.  
560 *Multiple Sclerosis (Houndmills, Basingstoke, England)*, 24(11), 1421-1432.  
561 <https://doi.org/10.1177/1352458517721355>
- 562 Melzer, D., Rice, N., Depledge, M. H., Henley, W. E., & Galloway, T. S. (2010). Association  
563 between serum perfluorooctanoic acid (PFOA) and thyroid disease in the U.S.  
564 National Health and Nutrition Examination Survey. *Environmental Health*  
565 *Perspectives*, 118(5), 686-692. <https://doi.org/10.1289/ehp.0901584>
- 566 Montani, L., Pereira, J. A., Norrmén, C., Pohl, H. B. F., Tinelli, E., Trötz Müller, M., Figlia,  
567 G., Dimas, P., von Niederhäusern, B., Schwager, R., Jessberger, S., Semenkovich, C.  
568 F., Köfeler, H. C., & Suter, U. (2018). De novo fatty acid synthesis by Schwann cells



569 is essential for peripheral nervous system myelination. *The Journal of Cell Biology*,  
570 217(4), 1353-1368. <https://doi.org/10.1083/jcb.201706010>

571 Moyon, S., Frawley, R., Marechal, D., Huang, D., Marshall-Phelps, K. L. H., Kegel, L.,  
572 Bøstrand, S. M. K., Sadowski, B., Jiang, Y.-H., Lyons, D. A., Möbius, W., &  
573 Casaccia, P. (2021). TET1-mediated DNA hydroxymethylation regulates adult  
574 remyelination in mice. *Nature Communications*, 12(1), 3359.  
575 <https://doi.org/10.1038/s41467-021-23735-3>

576 Nieuwkoop PD, Faber J. (s. d.). *Normal Table of Xenopus laevis (Daudin) 1994*. New York.  
577 Norton, W. T., & Poduslo, S. E. (1973). Myelination in rat brain : Changes in myelin  
578 composition during brain maturation. *Journal of Neurochemistry*, 21(4), 759-773.  
579 <https://doi.org/10.1111/j.1471-4159.1973.tb07520.x>

580 Olsen, G. W., Mair, D. C., Lange, C. C., Harrington, L. M., Church, T. R., Goldberg, C. L.,  
581 Herron, R. M., Hanna, H., Nobiletti, J. B., Rios, J. A., Reagen, W. K., & Ley, C. A.  
582 (2017). Per- and polyfluoroalkyl substances (PFAS) in American Red Cross adult  
583 blood donors, 2000-2015. *Environmental Research*, 157, 87-95.  
584 <https://doi.org/10.1016/j.envres.2017.05.013>

585 Remaud, S., Ortiz, F. C., Perret-Jeanneret, M., Aigrot, M.-S., Gothié, J.-D., Fekete, C.,  
586 Kvártá-Papp, Z., Gereben, B., Langui, D., Lubetzki, C., Angulo, M. C., Zalc, B., &  
587 Demeneix, B. (2017). Transient hypothyroidism favors oligodendrocyte generation  
588 providing functional remyelination in the adult mouse brain. *ELife*, 6.  
589 <https://doi.org/10.7554/eLife.29996>

590 Ronzano, R., Roux, T., Thetiot, M., Aigrot, M. S., Richard, L., Lejeune, F. X., Mazuir, E.,  
591 Vallat, J. M., Lubetzki, C., & Desmazières, A. (2021). Microglia-neuron interaction at  
592 nodes of Ranvier depends on neuronal activity through potassium release and



- 593 contributes to remyelination. *Nature Communications*, 12(1), 5219.
- 594 <https://doi.org/10.1038/s41467-021-25486-7>
- 595 Starnes, H. M., Rock, K. D., Jackson, T. W., & Belcher, S. M. (2022). A Critical Review and  
596 Meta-Analysis of Impacts of Per- and Polyfluorinated Substances on the Brain and  
597 Behavior. *Frontiers in Toxicology*, 4, 881584.
- 598 <https://doi.org/10.3389/ftox.2022.881584>
- 599 Stubleski, J., Salihovic, S., Lind, P. M., Lind, L., Dunder, L., McCleaf, P., Eurén, K., Ahrens,  
600 L., Svartengren, M., van Bavel, B., & Kärrman, A. (2017). The effect of drinking  
601 water contaminated with perfluoroalkyl substances on a 10-year longitudinal trend of  
602 plasma levels in an elderly Uppsala cohort. *Environmental Research*, 159, 95-102.
- 603 <https://doi.org/10.1016/j.envres.2017.07.050>
- 604 Sunderland, E. M., Hu, X. C., Dassuncao, C., Tokranov, A. K., Wagner, C. C., & Allen, J. G.  
605 (2019). A review of the pathways of human exposure to poly- and perfluoroalkyl  
606 substances (PFASs) and present understanding of health effects. *Journal of Exposure  
607 Science & Environmental Epidemiology*, 29(2), 131-147.
- 608 <https://doi.org/10.1038/s41370-018-0094-1>
- 609 Taylor, L. C., Puranam, K., Gilmore, W., Ting, J. P.-Y., & Matsushima, G. K. (2010). 17beta-  
610 estradiol protects male mice from cuprizone-induced demyelination and  
611 oligodendrocyte loss. *Neurobiology of Disease*, 39(2), 127-137.
- 612 <https://doi.org/10.1016/j.nbd.2010.03.016>
- 613 Thetiot, M., Ronzano, R., Aigrot, M.-S., Lubetzki, C., & Desmazières, A. (2019). Preparation  
614 and Immunostaining of Myelinating Organotypic Cerebellar Slice Cultures. *Journal of  
615 Visualized Experiments: JoVE*, 145. <https://doi.org/10.3791/59163>

- 616 UNEP. (2012). *Report of the United Nations Environment Programme (UNEP) Submitted to*  
617 *the 11th Session of the United Nations Permanent Forum on Indigenous Issues.*  
618 United nation.
- 619 Vancamp, P., Butruille, L., Herranen, A., Boelen, A., Fini, J.-B., Demeneix, B. A., &  
620 Remaud, S. (2023). Transient developmental exposure to low doses of bisphenol F  
621 negatively affects neurogliogenesis and olfactory behaviour in adult mice.  
622 *Environment International*, 172, 107770. <https://doi.org/10.1016/j.envint.2023.107770>
- 623 Vancamp, P., Gothié, J.-D., Luongo, C., Sébillot, A., Le Blay, K., Butruille, L., Pagnin, M.,  
624 Richardson, S. J., Demeneix, B. A., & Remaud, S. (2019). Gender-specific effects of  
625 transthyretin on neural stem cell fate in the subventricular zone of the adult mouse.  
626 *Scientific Reports*, 9(1), 19689. <https://doi.org/10.1038/s41598-019-56156-w>
- 627 Vancamp, P., Le Blay, K., Butruille, L., Sébillot, A., Boelen, A., Demeneix, B. A., &  
628 Remaud, S. (2022). Developmental thyroid disruption permanently affects the  
629 neuroglial output in the murine subventricular zone. *Stem Cell Reports*, S2213-  
630 6711(22)00046-7. <https://doi.org/10.1016/j.stemcr.2022.01.002>
- 631 Vanden Heuvel, J. P., Kuslikis, B. I., Van Rafelghem, M. J., & Peterson, R. E. (1991).  
632 Disposition of perfluorodecanoic acid in male and female rats. *Toxicology and Applied*  
633 *Pharmacology*, 107(3), 450-459. [https://doi.org/10.1016/0041-008x\(91\)90308-2](https://doi.org/10.1016/0041-008x(91)90308-2)
- 634 Vandenberg, L. N., Colborn, T., Hayes, T. B., Heindel, J. J., Jacobs, D. R., Lee, D.-H.,  
635 Shioda, T., Soto, A. M., vom Saal, F. S., Welshons, W. V., Zoeller, R. T., & Myers, J.  
636 P. (2012). Hormones and endocrine-disrupting chemicals : Low-dose effects and  
637 nonmonotonic dose responses. *Endocrine Reviews*, 33(3), 378-455.  
638 <https://doi.org/10.1210/er.2011-1050>
- 639 Villeneuve, D. L., Blackwell, B. R., Cavallin, J. E., Collins, J., Hoang, J. X., Hofer, R. N.,  
640 Houck, K. A., Jensen, K. M., Kahl, M. D., Kutsi, R. N., Opseth, A. S., Santana

- 641 Rodriguez, K. J., Schaupp, C., Stacy, E. H., & Ankley, G. T. (2023). Verification of In  
642 Vivo Estrogenic Activity for Four Per- and Polyfluoroalkyl Substances (PFAS)  
643 Identified as Estrogen Receptor Agonists via New Approach Methodologies.  
644 *Environmental Science & Technology*, 57(9), 3794-3803.  
645 <https://doi.org/10.1021/acs.est.2c09315>
- 646 Walter, K. M., Singh, L., Singh, V., & Lein, P. J. (2021). Investigation of NH<sub>3</sub> as a selective  
647 thyroid hormone receptor modulator in larval zebrafish (*Danio rerio*).  
648 *NeuroToxicology*, 84, 96-104. <https://doi.org/10.1016/j.neuro.2021.03.003>
- 649 Walton, C., King, R., Rechtman, L., Kaye, W., Leray, E., Marrie, R. A., Robertson, N., La  
650 Rocca, N., Uitdehaag, B., van der Mei, I., Wallin, M., Helme, A., Angood Napier, C.,  
651 Rijke, N., & Baneke, P. (2020). Rising prevalence of multiple sclerosis worldwide :  
652 Insights from the Atlas of MS, third edition. *Multiple Sclerosis (Houndmills,*  
653 *Basingstoke, England)*, 26(14), 1816-1821.  
654 <https://doi.org/10.1177/1352458520970841>
- 655 Wan, H. T., Zhao, Y. G., Wei, X., Hui, K. Y., Giesy, J. P., & Wong, C. K. C. (2012). PFOS-  
656 induced hepatic steatosis, the mechanistic actions on  $\beta$ -oxidation and lipid transport.  
657 *Biochimica Et Biophysica Acta*, 1820(7), 1092-1101.  
658 <https://doi.org/10.1016/j.bbagen.2012.03.010>
- 659 Weiss, J. M., Andersson, P. L., Lamoree, M. H., Leonards, P. E. G., van Leeuwen, S. P. J., &  
660 Hamers, T. (2009). Competitive binding of poly- and perfluorinated compounds to the  
661 thyroid hormone transport protein transthyretin. *Toxicological Sciences: An Official*  
662 *Journal of the Society of Toxicology*, 109(2), 206-216.  
663 <https://doi.org/10.1093/toxsci/kfp055>
- 664 Yadav, A., Verhaegen, S., Hadera, M. G., Berntsen, H. F., Berg, V., Lyche, J. L.,  
665 Sabaredzovic, A., Haug, L. S., Myhre, O., Zimmer, K. E., Paulsen, R. E., Ropstad, E.,

- 666 & Boix, F. (2022). Peripherally administered persistent organic pollutants distribute to  
667 the brain of developing chicken embryo in concentrations relevant for human  
668 exposure. *Neurotoxicology*, 88, 79-87. <https://doi.org/10.1016/j.neuro.2021.10.013>
- 669 Yu, W.-G., Liu, W., & Jin, Y.-H. (2009). Effects of perfluorooctane sulfonate on rat thyroid  
670 hormone biosynthesis and metabolism. *Environmental Toxicology and Chemistry*,  
671 28(5), 990-996. <https://doi.org/10.1897/08-345.1>
- 672 Zhang, W., Zhang, Y., Taniyasu, S., Yeung, L. W. Y., Lam, P. K. S., Wang, J., Li, X.,  
673 Yamashita, N., & Dai, J. (2013). Distribution and fate of perfluoroalkyl substances in  
674 municipal wastewater treatment plants in economically developed areas of China.  
675 *Environmental Pollution (Barking, Essex: 1987)*, 176, 10-17.  
676 <https://doi.org/10.1016/j.envpol.2012.12.019>
- 677 Zorrilla Veloz, R. I., McKenzie, T., Palacios, B. E., & Hu, J. (2022). Nuclear hormone  
678 receptors in demyelinating diseases. *Journal of Neuroendocrinology*, 34(7), e13171.  
679 <https://doi.org/10.1111/jne.13171>

680

## 681 7. Figure legends

682

683 **Figure 1: Accumulation of PFAS into pups' myelin fraction.** A) Flow chart of PFAS exposure  
684 (20mg/L) of adult female mice via the drinking water from E15 of gestation and during the  
685 lactation period. At 3 weeks (p21), dams and pups were euthanized, brains dissected out and myelin  
686 bulk fraction purified on a Percoll<sup>®</sup> gradient. B-E) At p21, PFAS were assayed by LC-MS/MS in  
687 the serum of dams and pups (B, D) and corresponding myelin fractions (C, E). Although similar  
688 levels of either PFOS or PFOA passed from the drinking water into the mother serum and from  
689 the mother milk into the pups' serum, 133 time more PFOS was detected into the pup's myelin  
690 fraction compared to PFOA. Note that low level of both PFOS and PFOA were detected into the  
691 myelin of control animals (E), which is explained by the presence of these PFAS into the normal  
692 drinking water given to control dams (see supplemental table 1).

693

694 **Figure 2: Perinatal exposure to PFOS, but not PFOA, increased the generation of SVZ-**  
695 **derived oligodendrocyte precursor cells (OPCs), which were not able to mature into**  
696 **myelin-forming oligodendrocytes.** A, F) Schematic drawing showing on coronal sections of p21  
697 pups level illustrated in B-D for subventricular zone and in G-I and K-M for corpus callosum  
698 exposed to either PFOS, PFOA or control (CTL). B-E) section at the level of the SVZ  
699 immunostained for OLIG2 (green in B-D), at the level of the corpus callosum doubly stained for  
700 OLIG2 (green) and CC1 (red in G-I), and with anti-PLP to stain myelinated fibers (K-M) above  
701 the lateral ventricles. Note for PFOS exposed animals the increased density of OPC-OLIG2+ cells  
702 (C, E) contrasting with the lower ratio of mature oligodendrocytes OLIG2+/CC1+ (H, I) and the  
703 lower myelin staining (PLP+) in (L, N). In contrast, in brain sections of PFOA exposed animals,  
704 no significative differences compared to controls were observed. Nuclei are counterstained with  
705 DAPI; CC= corpus callosum, SVZ= subventricular zone, LV= lateral ventricles. Scale bar : B, C,  
706 D, F, G, H = 50µm; K, L, M = 25µm

707

708 **Figure 3: *Ex vivo* PFOS exposure inhibited remyelination.** A) Flow chart showing the  
709 sequence of lysophosphatidylcholine-induced transient demyelination (from DIV6 to DIV7) of  
710 cerebellar slices followed by exposure to PFAS during the endogenous remyelination period, from  
711 DIV7 to DIV12. B-D) Cerebellar slices from P9 mice at 12 DIV doubly immunostained for  
712 calbindin (Purkinje cell bodies and axons in red in B, D, E, G) and PLP, (myelinated axons in green  
713 in C, D, F, G); note the decreased PLP+ myelin staining in slices exposed to PFOS, while Purkinje  
714 cells and axons appeared unaffected (E) compared to controls (B); arrow head in E and G point  
715 to axons not ensheathed by myelin. (H, I) Dose response curve of either PFOS (H) or PFOA (I)  
716 exposure on the myelin index measured as a ratio between the calbindin (axon)and PLP (myelin)  
717 stainings. Note the non-monotonic dose response of PFOS and the reversal of PFOS inhibitory

718 effect on remyelination by addition of T3 into the culture medium (hachured column in H). In  
719 contrast PFOA (I) did not affect remyelination. Scale bar: B-G= 50 $\mu$ m.

720

721 **Figure 4: *In vivo* PFOS inhibited remyelination.** (A) Flow chart showing the sequence of  
722 events tested. (B) Whole mount of Tg(*Mbp:GFP-ntf*) *Xenopus laevis* (stage 50 tadpoles) showing  
723 GFP expression in the brain, optic nerve (white arrows) and spinal cord. At this magnification  
724 GFP+ oligodendrocyte cell bodies are not visible. (C-F) Higher magnification of Tg(*Mbp:GFP-ntf*)  
725 *Xenopus laevis* optic nerve before (D0)(C), at the end of metronidazole-induced demyelination  
726 (D10)(D) and after 3 days (R3) of spontaneous recovery in control (E) or PFOS exposed tadpoles  
727 (F); scale bar in B= 500 $\mu$ m in C-F = 50  $\mu$ m. (G, H) Dose response of remyelination after addition  
728 for 3 days of either PFOS (G) or PFOA (H). Remyelination was evaluated by counting the number  
729 of GFP+ oligodendrocytes per optic nerve. Note the non-monotonic inhibition of remyelination  
730 following PFOS exposure, while PFOA had no effect. (I-K) PFOS inhibition of remyelination  
731 affected tadpoles' behavior as assayed by distance traveled (I), speed of swimming (J) and visual  
732 avoidance of a virtual collision (K) contrasting with the absence of effect of PFOA.

733

## 734 8. Supporting information

### 735 8.1. Antibodies

736 Mouse mAb anti-Calbindin (IgG1, Sigma C9848, 1:800), rat mAb anti-PLP (culture supernatant  
737 1:20; kindly provided by Dr. K. Ikenaka, Okasaki, Japan), chicken anti-GFP (1:500;  
738 Millipore); rabbit anti-Olig2 Ab (diluted 1:300, Millipore, AB15328), and a mouse IgG2b anti-  
739 adenomatous polyposis coli (APC, clone CC1; diluted 1:300, Calbiochem). Corresponding Alexa  
740 Fluor secondary antibodies were from Invitrogen (Thermo-Fisher) and all were used at a dilution  
741 of 1:600).

742

### 743 8.2. Mouse cerebellar slice preparation

744 Mouse cerebella from p9 animals were dissected in ice cold Gey's balanced salt solution  
745 complemented with 4.5 mg/ml d-Glucose and penicillin-streptomycin (100 IU/mL, Thermo  
746 Fisher Scientific). They were cut into 300  $\mu\text{m}$  parasagittal slices using a McIlwain tissue chopper  
747 and the slices placed on Millicell membrane (3–4 slices per membrane, 2 membranes per animal,  
748 0.4  $\mu\text{m}$  Millicell, Merck Millipore) in 50% BME (Thermo Fisher Scientific), 25% Earle's Balanced  
749 Salt Solution (Sigma), 25% heat-inactivated horse serum (Thermo Fisher Scientific), supplemented  
750 with GlutaMax (2 mM, Thermo Fisher Scientific), penicillin–streptomycin (100 IU/mL, Thermo  
751 Fisher Scientific), and d-Glucose (4.5 mg/ml; Sigma). Cultures were maintained at 37 °C under 5%  
752 CO<sub>2</sub> and medium changed every two to three days. At DIV6, demyelination was induced in  
753 cerebellar slices by treatment with lysophosphatidylcholine (LPC 50 mg/ml) for 15h. After 3  
754 washes in 1X PBS, slices were incubated in a fresh culture medium for 4h then in medium  
755 supplemented with EDCs. At 12 DIV, cerebellar slices were fixed with 4% paraformaldehyde for  
756 10 min and washed 3 times in 1X PBS. Slices were then blocked with 10% normal goat serum and  
757 doubly immunostained with a combination of anti-PLP and anti-Calbindin. After 3 washes,  
758 cerebellar slices were incubated with corresponding Alexa-conjugated fluorescent secondary  
759 antibodies and mounted on glass slides with DAPI Fluoromount-G (Invitrogen).

760

### 761 **8.3. Quantification of myelin on mouse cerebellar slice preparation**

762 To analyze the effect of PFAS treatments on remyelination *ex vivo*, three folia per cerebellar slices  
763 were acquired per condition for each animal (2400 × 2400 pixels<sup>11</sup> z-series with a z-step of 0.375  
764  $\mu\text{m}$ ). The myelination index was calculated semi-automatically using a custom written script on  
765 ImageJ. Briefly, a region of interest including Purkinje cells axon (excluding soma and white matter  
766 tracks) was first selected. A mask for axonal area (Calbindin signal) and a mask for myelinated  
767 axonal area (PLP signal overlapping with Calbindin signal) were then generated, and the  
768 myelination index was calculated from the quotient of the area of the two respective masks



769 (myelin/axon). Myelination indexes of the five images were averaged to give the mean myelination  
770 index per animal for each condition.

771

#### 772 **8.4. Immunohistochemistry and quantification on brain section**

773 Brains were fixed in 4% paraformaldehyde in PBS overnight at 4°C, cryoprotected in 30% sucrose  
774 and embedded in OCT (Sakura Finetek, the Netherlands) before being frozen and stored at -80°C.  
775 Coronal floating sections (20 µm) were made on a cryostat and stored at -20°C in cryoprotectant  
776 solution. P21 mice (n=10 CTL, n=10 PFOS and n=6 PFOA) were used for  
777 immunohistochemistry. Sections (n=3-4 per mouse) were incubated for 30 min in blocking  
778 solution 1% BSA (Sigma), 0.3% Triton X-100 and 10% donkey serum (Sigma) in 1X PBS at room  
779 temperature (RT), and then incubated with primary antibodies (anti-OLIG2, CC1 and anti-PLP)  
780 diluted in the same solution overnight at 4°C. After 3 washes (for 5 min) in 1X PBS at RT, sections  
781 were incubated with Alexa-conjugated fluorescent secondary antibodies (1% BSA, 0.3% Triton X-  
782 100 and 1% donkey serum in 1X PBS) for 2h at RT. Following incubation with DAPI for 5 min at  
783 RT, sections were covered with Prolong Gold antifade reagent (Invitrogen) and sealed with  
784 coverslips. Images were acquired using a Nikon confocal microscope under 400x magnification.  
785 The dorsal SVZ was imaged to analyze the density of OLIG2+ OPCs. To quantify OPCs vs mature  
786 oligodendrocytes and myelin in the corpus callosum, three images were acquired per section. Cell  
787 quantification was performed with FIJI software, using the cell counter plugin. The cell density  
788 (number/mm<sup>2</sup>) was calculated by counting the number of immuno-positive cells per area. For  
789 PLP, the labeling surface was automatically quantified and related to the area surface.

790

#### 791 **8.5. Quantification of GFP<sup>+</sup> cells**

792 GFP was detected directly by fluorescence in live Tg(*Mbp:GFP-ntr*) transgenic *Xenopus* embryos  
793 using an AZ100 Nikon Zoom Macroscope. The total number of GFP<sup>+</sup> cells was counted in the  
794 optic nerve, from the emergence of the nerve (i.e., after the chiasm) to the retinal end. For stage



795 50 tadpoles the length of the optic nerve is on average  $1700 \mu\text{m} \pm 100 \mu\text{m}$  for a diameter of  $50 \mu\text{m}$ .  
796 GFP<sup>+</sup> cells were counted before (D0) and at the end of MTZ exposure (D10) and after being  
797 returned to normal water for 3 days (R3) or water containing the PFAS to be tested on the same  
798 embryos. Counts were performed independently by two researchers. Difference in numbers  
799 obtained by each researcher was below 10%. Data were compared to control untreated animals of  
800 the same developmental stage.

801

## 802 **8.6. Behavioral testing**

803 Tadpoles were tested in the morning before being fed. The setup consists of a CRT monitor (Dell  
804 Model #M570, 100-240 V, 60/50 Hz, 1.4 A, refresh rate used 60 Hz). The screen was covered with  
805 a 10mm diameter mask, adapted to a petri dish. Movement of tadpoles were recorded with a  
806 Dragonfly2 DR2-HIBW camera at 30 pfs and the Computar M3Z1228C-MP2/3" 12-36 mm  
807 Varifocal, Manual Iris Megapixel (C mount) lens. The video recording system used was  
808 FlyCapture2.

809 The setup was localized in a darkroom, light was turned off so that the only light perceived by  
810 tadpoles came from the screen. Each animal was tested separately in the Petri dish filled up to 1cm  
811 with MMR 0.1 X medium. Tadpoles were placed in the Petri dish and left to adapt to the screen-  
812 light for 5-10 s. Spontaneous swimming was recorded for 30 s and average speed for this period  
813 analyzed. If the animal was immobile at first it was touched with a plastic pipette to initiate  
814 movement, this first acceleration being excluded from analysis.

815 The virtual avoidance collision test was performed after all animals had been tested for spontaneous  
816 swimming behavior. A black dot (18 pixel = 8 mm on the screen) was presented on the screen, the  
817 experimenter targeted the eye of the tadpole by changing the direction and speed of the dot. On  
818 average, 5-6 tryouts were performed to assess visual avoidance. The virtual collision setup can be  
819 found on AK web site <https://github.com/khakhalin/Xenopus-Behavior>

820 Analysis of videos recordings was with Noldus Ethovision XT 11.5 software. For each experiment  
821 detection settings were calibrated. After tracking of the tadpole and the moving black dot the  
822 trajectories were individually verified and modified in case of swapping identity between tadpole  
823 and dot or in case of failure of automated detection. To determine visual avoidance several escape  
824 responses were analyzed and it was determined that a successful avoidance response corresponded  
825 to an acceleration swim of the tadpole  $>50 \text{ cm.s}^{-2}$  and a change in direction (C-start) verified by  
826 the experimenter, initiated for a distance between the tadpole and the dot of 1-1.3 cm. Data are  
827 presented as an avoidance rate, i.e., the ratio of the number of encounters that resulted in a  
828 successful avoidance.

829

## 830 **9. Legend to Supplementary Figure 1**

831 **Remyelination is dependent on thyroid hormone signaling.** Spontaneous remyelination of  
832 mouse cerebellar slices demyelinated by LPC is increased by addition of T3 (10nM) into the culture  
833 medium and inhibited by NH3 (5 $\mu$ M) a thyroid hormone receptor antagonist. Purkinje cells and  
834 axons were immunostained with anti-calbindin (A, C, D, F) and myelin sheath with anti-PLP (B,  
835 E). G) Myelination index was evaluated in all 4 conditions.

836

## 837 **10. Supplementary Table 1**

838 Level of PFOS and PFOA (assayed by LC-MS/MS) in serum, myelin and in the milieu (water, food  
839 pellet and litter).

## 840 **11. Contact and competing interest information for all authors:**

841 The authors have no conflict of interest to declare relevant to this manuscript.

842

## 843 **12. Funding**

844 Our laboratories are supported by Inserm, CNRS, MNHN, Sorbonne University, Paris Brain  
845 Institute (ICM), the program “Investissements d’avenir” programs ANR-10-IAIHU-06 (IHU-A-  
846 ICM) and NeurATRIS. The study was partially funded by research grants to BZ and SR from the  
847 European Union’s Horizon 2020 Research and Innovation Program ENDpoiNT’s project Grant  
848 Agreement number: 825759, grant BRECOMY funded jointly by DFG and ANR, grant  
849 MADONNA from ANSES EST 2018-199; IONESCO and ACACIA grants from NeurATRIS.

Figure 1

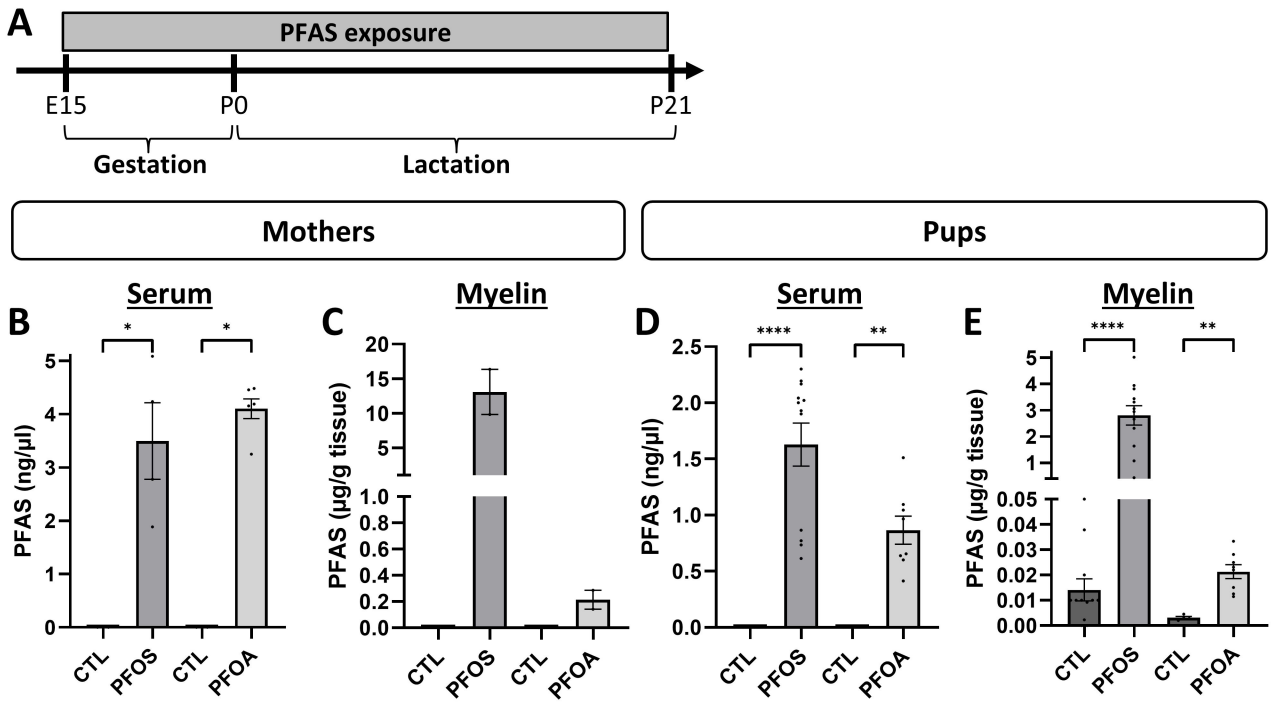

**Figure 2**

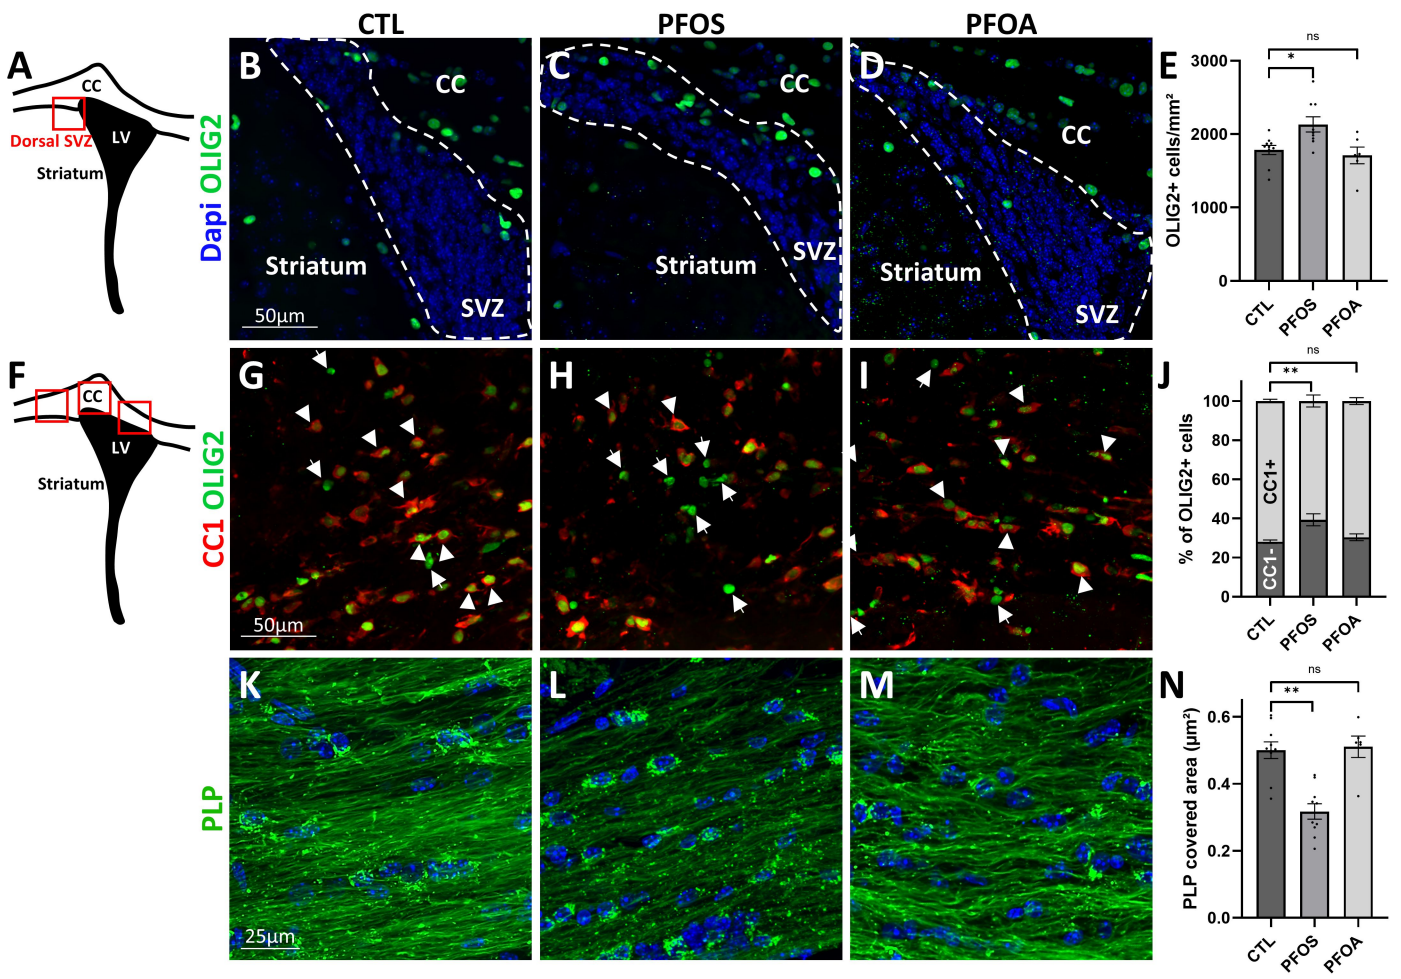

**Figure 3**

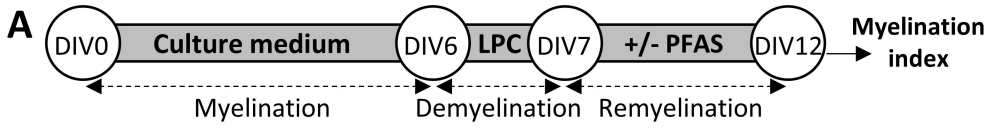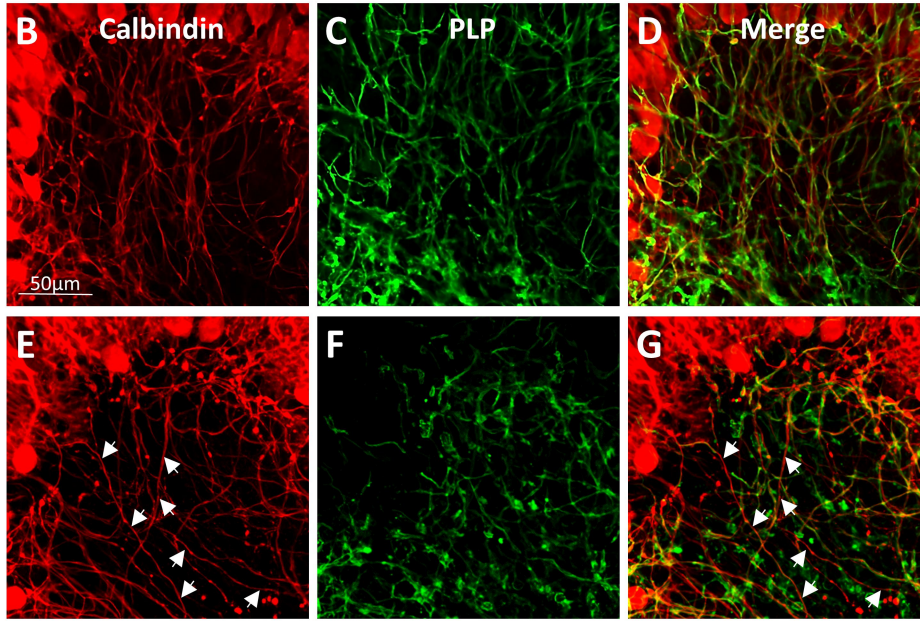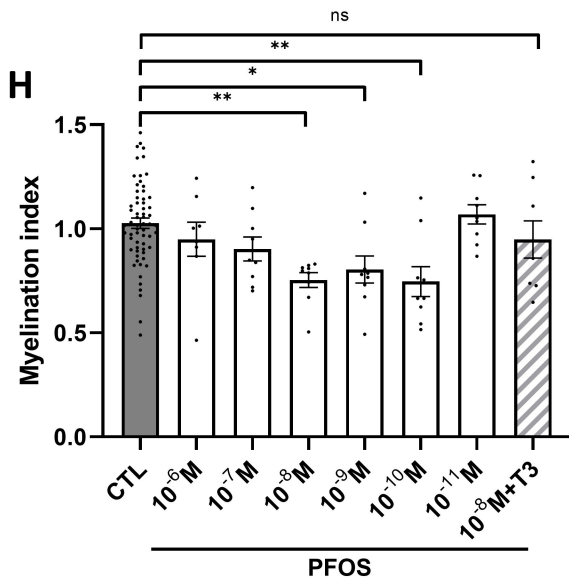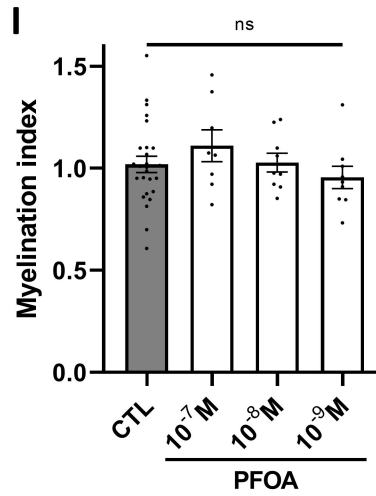

**Figure 4**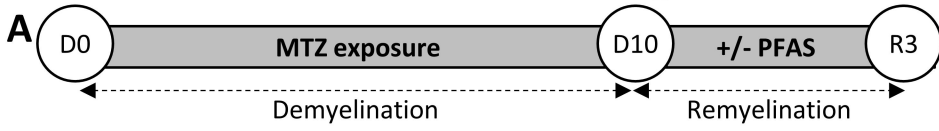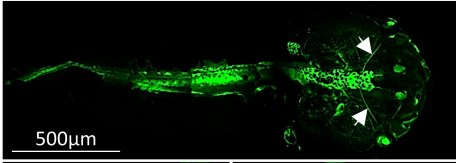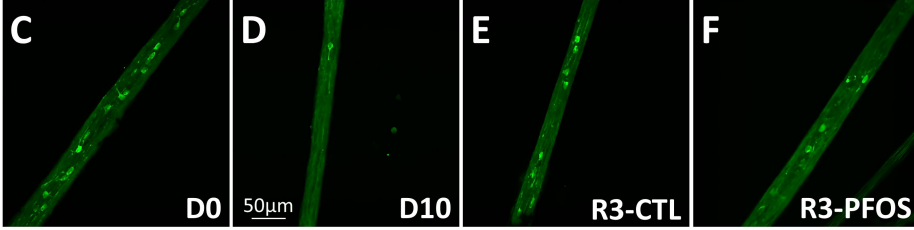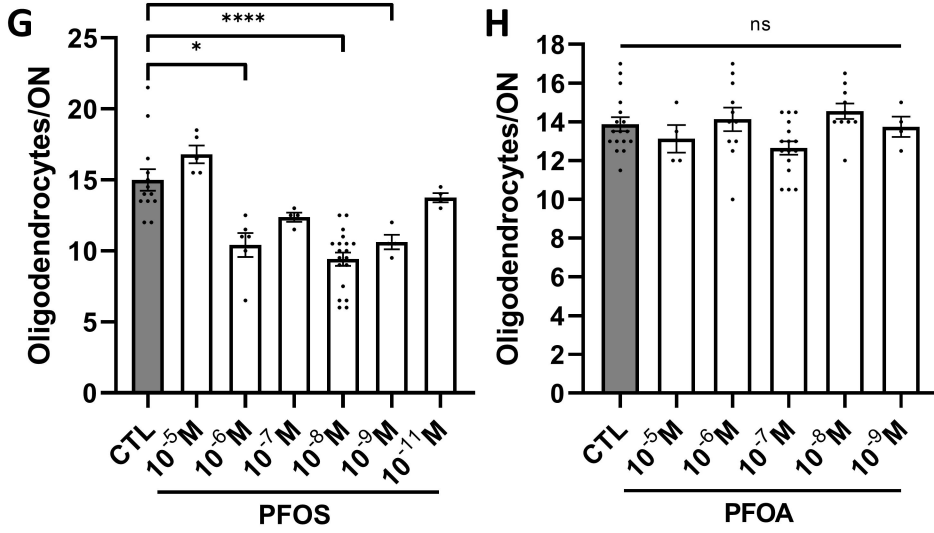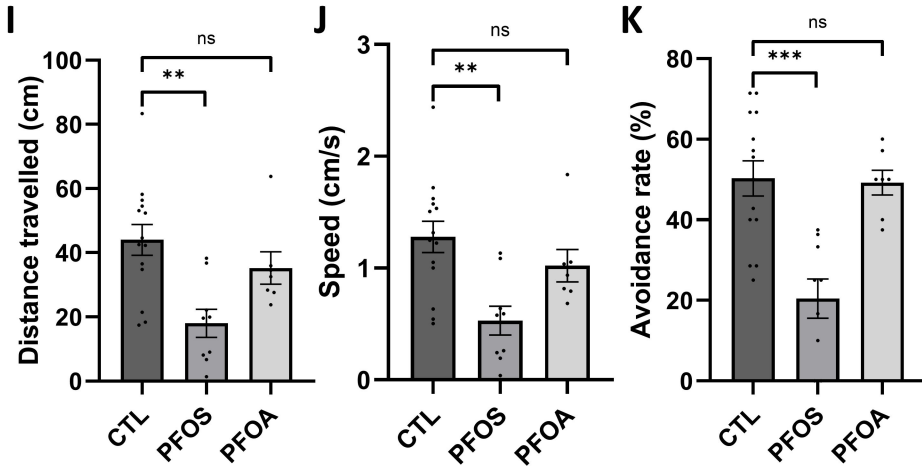

Source: https://www.biorxiv.org/content/10.1101/2023.05.30.542807v1.full.pdf
